1  
2  
3  
4  
5  
6  
7  
8  
9  
10  
11  
12  
13  
14  
15  
16  
17  
18  
19  
20  
21  
22  
23  
24  
25  
26  
27  
28  
29  
30

A genetic screen using the *Drosophila melanogaster* TRiP RNAi collection to identify metabolic enzymes required for eye development

Rose C. Pletcher<sup>1</sup>, Sara L. Hardman<sup>1</sup>, Sydney F. Intagliata<sup>1</sup>, Rachael L. Lawson<sup>1</sup>, Aumunique Page<sup>1</sup>, and Jason M. Tennessen<sup>1\*</sup>

<sup>1</sup>Department of Biology, Indiana University, 1001 East Third Street, Bloomington, IN 47405, USA

\*Corresponding Author

Email: [jtenness@indiana.edu](mailto:jtenness@indiana.edu)

Tel: (812)-855-9803

**Key words:** *Drosophila*, metabolism, mitochondria, oxidative phosphorylation, GPI-anchor, glutamine metabolism

31 **ABSTRACT**

32 The metabolic enzymes that compose glycolysis, the citric acid cycle, and other pathways within  
33 central carbon metabolism have emerged as key regulators of animal development. These  
34 enzymes not only generate the energy and biosynthetic precursors required to support cell  
35 proliferation and differentiation, but also moonlight as regulators of transcription, translation,  
36 and signal transduction. Many of the genes associated with animal metabolism, however, have  
37 never been analyzed in a developmental context, thus highlighting how little is known about the  
38 intersection of metabolism and development. Here we address this deficiency by using the  
39 *Drosophila* TRiP RNAi collection to disrupt the expression of over 1,100 metabolism-associated  
40 genes within cells of the eye imaginal disc. Our screen not only confirmed previous observations  
41 that oxidative phosphorylation serves a critical role in the developing eye, but also implicated a  
42 host of other metabolic enzymes in the growth and differentiation of this organ. Notably, our  
43 analysis revealed a requirement for glutamine and glutamate metabolic processes in eye  
44 development, thereby revealing a role of these amino acids in promoting *Drosophila* tissue  
45 growth. Overall, our analysis highlights how the *Drosophila* eye can serve as a powerful tool for  
46 dissecting the relationship between development and metabolism.

## 47 INTRODUCTION

48 The fruit fly *Drosophila melanogaster* has emerged as a powerful model for investigating  
49 the metabolic mechanisms that support animal growth and development. In this regard, a key  
50 advantage of studying metabolism in the fly is that the disruption of an individual metabolic  
51 reaction often induces a specific phenotype, thus revealing energetic and biosynthetic bottlenecks  
52 that influence cell growth, proliferation, and differentiation. For example, mutations that disrupt  
53 activity of the citric acid cycle (TCA cycle) enzymes Isocitrate Dehydrogenase 3b (Idh3b) and  
54 Malate Dehydrogenase 2 (Mdh2) prevent the larval salivary glands from dying at the onset of  
55 metamorphosis (WANG *et al.* 2008; WANG *et al.* 2010; DUNCAN *et al.* 2017). These observations  
56 suggest that the salivary glands are uniquely dependent on the TCA cycle to activate the cell  
57 death program and reveal an unexpected relationship between central carbon metabolism and  
58 metamorphosis. Such phenotype-driven studies are essential for investigating how metabolism  
59 and development are coordinated during the fly life cycle.

60 The *Drosophila* eye has long served as a powerful model for both metabolism and  
61 development (for reviews, see DICKINSON AND SULLIVAN 1975; KUMAR 2018). Many of the  
62 earliest genetic studies conducted in the fly were based upon genes such as *vermillion*, *cinnabar*,  
63 and *rosy*, which control eye pigmentation and encode enzymes involved in tryptophan and purine  
64 metabolism (LINDSLEY AND ZIMM 1992). Similarly, classic work by Beadle and Ephrussi used  
65 transplantation experiments to demonstrate that ommochromes are synthesized in larval  
66 peripheral tissues and transported into the eye (BEADLE AND EPHRUSSI 1936), thus revealing that  
67 metabolism is systemically coordinated during development. Nearly a century later, the  
68 *Drosophila* eye still serves as an essential tool for studying developmental metabolism – a fact  
69 that is best illustrated by a finding from Utpal Banerjee’s lab. In a classic demonstration of how  
70 unbiased screens can identify unexpected developmental regulators, members of the Banerjee lab  
71 discovered that the *Drosophila* gene *CoVa* (FBgn0019624; also known as *tenured* and *COX5A*),  
72 a subunit of Complex IV within the electron transport chain (ETC) is essential for normal eye  
73 development (MANDAL *et al.* 2005). While such a discovery could have been easily discounted  
74 as the disruption of a housekeeping gene, characterization of *CoVa* mutants demonstrated that  
75 reduced oxidative phosphorylation (OXPHOS) induces a G1 cell-cycle arrest during the second  
76 mitotic wave (MANDAL *et al.* 2005). Moreover, this phenomenon was found to be orchestrated  
77 by the metabolic sensor AMPK, which responds to the decreased ATP levels present within

78 *CoVa* mutant cells by activating p53 and lowering Cyclin E levels (MANDAL *et al.* 2005). These  
79 studies of *CoVa* function, together with similar studies of other electron transport chain (ETC)  
80 subunits and mitochondrial tRNAs (MANDAL *et al.* 2005; LIAO *et al.* 2006), demonstrate that the  
81 eye can be used to efficiently understand how metabolism is integrated with developmental  
82 signaling pathways.

83         Here we use the *Drosophila* TRiP RNAi collection to identify additional metabolism-  
84 associated genes that influence eye development. Our screen used the *eyes absent composite*  
85 *enhancer-GAL4* (*eya composite-GAL4*) driver to induce expression of 1575 TRiP RNAi  
86 transgenes (representing 1129 genes) during development of the eye imaginal disc (WEASNER *et*  
87 *al.* 2016). This analysis not only confirmed previous findings that genes involved in OXPHOS  
88 are essential for eye development, but also uncovered a role for glutamate and glutamine  
89 metabolism within this tissue. Moreover, we identified several poorly characterized enzymes that  
90 are essential for normal eye formation, thus hinting at novel links between metabolism and tissue  
91 development. Overall, our genetic screen provides a snapshot of the biosynthetic and energetic  
92 demands that the development of a specific organ imposes upon intermediary metabolism.

93

94

95



96 **METHODS**

97 *Drosophila Strains and Husbandry*

98 Fly stocks and crosses were maintained at 25° C on Bloomington *Drosophila* Stock Center  
99 (BDSC) food. All genetic crosses described herein used *eya composite-GAL4* to induce  
100 transgene expression (a kind gift from Justin Kumar's lab, WEASNER *et al.* 2016). The TRiP  
101 RNAi lines used in this study were selected by searching the BDSC stock collection using a  
102 previously described list of metabolism-associated genes (TENNESSEN *et al.* 2014; PERKINS *et al.*  
103 2015). All strains used in this study are available through the BDSC.

104

105 *Genetics Crosses and Phenotypic Characterization*

106 Five adult male flies from each TRiP stock was crossed with five *w<sup>1118</sup>*; *eya composite-GAL4*  
107 adult virgin females. For each cross, F1 progeny heterozygous for both *eya composite-GAL4* and  
108 the *UAS-RNAi* transgene were scored for eye phenotypes within three days of eclosion. Eyes  
109 were scored for the following phenotypes: rough, glossy, small, no eye, misshaped, overgrowth,  
110 necrosis, abnormal pigmentation, and lethality prior to eclosion. Whenever possible, at least 20  
111 adults were scored from during this screen. Any TRiP stock that produced a phenotype during  
112 the initial analysis was reanalyzed using the same mating scheme described above and twenty  
113 flies of each sex were scored. In some instances, expression of the TRiP transgene induced a  
114 lethal or semi-lethal phenotype prior to eclosion, thus limiting the number of animals that could  
115 be scored in our analysis. To avoid confirmation bias, each cross was only labeled with the  
116 BDSC strain number and the genotype was revealed only after phenotypic characterization.

117

118 *Statistical Analysis of Pathway Enrichment*

119 Genes were assigned to individual pathways based on the metabolic pathways annotated within  
120 the Kyoto Encyclopedia of Genes and Genomes (KEGG) pathways (KANEHISA 2017; KANEHISA  
121 *et al.* 2019). Enrichment analyses for individual metabolic pathways were conducted using  
122 Fisher's exact test with the P value being calculated using two tails. For the purpose of these  
123 calculations, expression of 165 transgenes induced a phenotype while the expression of 1410  
124 transgenes had no effect on eye development.

125

126 **DATA AVAILABILITY**

127 All TRiP lines used in this study are available from the BDSC. The *eya composite-GAL4*  
128 strain is available upon request. Data generated in this study have been uploaded to the RNAi  
129 Stock Validation and Phenotype (RSVP) database, which is publically available through the  
130 DRSC/TRiP Functional Genomics Resources website. The full list of TRiP stocks used in our  
131 analysis can be found in Supplemental Table 2 and the strains analyzed in the secondary screen  
132 are listed in Supplemental Table 3. To facilitate replication of our study, all supplemental tables  
133 contain both the BDSC and FlyBase identification numbers (Fbgn).

## 134 RESULTS

135 To identify metabolic processes involved in eye development, we used the *eya*  
136 *composite-GAL4* driver to express TRiP RNAi transgenes that target metabolism-associated  
137 genes (Supplemental Table 1). Since this GAL4 driver promotes transgene expression in the eye  
138 imaginal disc from the L2 stage until after the morphogenetic furrow moves across the eye field  
139 (WEASNER *et al.* 2016), our screen of 1575 TRiP RNAi lines was designed to identify metabolic  
140 processes required for the proliferation and differentiation of cells within this organ. Of the  
141 RNAi transgenes examined, 198 induced an eye phenotype in the initial screen and 165  
142 subsequently generated reproducible phenotypes (Supplemental Tables 2 and 3).

143 Among the TRiP lines that consistently induced an eye phenotype were a number of  
144 positive controls. Notably, the RNAi transgene that targets *CoVa* (BDSC 27548) induced glossy-  
145 eye phenotype (Figure 1A-B; Supplemental Tables 2 and 3), thus phenocopying the eye defect  
146 associated with *CoVa* mutant clones (MANDAL *et al.* 2005). Moreover, TRiP RNAi lines that  
147 interfere with expression of *Insulin Receptor* (BDSC 35251; FBgn0283499, REF), *PI3K* (BDSC  
148 27690; FBgn0015279), *Akt* (BDSC 31701 and 33615; FBgn0010379), *Tor* (BDSC 34639;  
149 FBgn0021796), and *raptor* (BDSC 31528, 31529, and 34814; FBgn0029840) resulted in either  
150 small or misshapen eyes (Figure 1C; Supplemental Tables 2 and 3). Similarly, RNAi-induced  
151 depletion of the negative growth regulators *PTEN* (BDSC 25967 and 33643; FBgn0026379),  
152 *Tsc1* (BDSC 52931 and 54034; FBgn0026317) and *Tsc2* (BDSC 34737; FBgn0005198) induced  
153 an overgrowth phenotype (Figure 1D; Supplemental Tables 2 and 3). Our findings are consistent  
154 with previous studies that described roles for these insulin and Tor signaling pathway  
155 components in eye development (CHEN *et al.* 1996; BOHNI *et al.* 1999; GOBERDHAN *et al.* 1999;  
156 HUANG *et al.* 1999; ITO AND RUBIN 1999; VERDU *et al.* 1999; WEINKOVE *et al.* 1999; GAO *et al.*  
157 2000; OLDHAM *et al.* 2000; POTTER *et al.* 2001).

158 Our ability to identify TRiP lines that interfere with the expression of known growth  
159 regulators suggests that our screen efficiently identified key metabolism-associated genes  
160 involved in eye development. We would note, however, that a screen of this nature will  
161 inevitably produce false-positive results due to the off-target RNAi effect and false negative  
162 results due to inefficient depletion of target transcripts. Therefore, we will limit the Results and  
163 Discussion sections to those pathways that are either represented by multiple positive results or  
164 are notably absent in our analysis.

## 165 Oxidative Phosphorylation

166           Of the 164 RNAi transgenes that consistently induced an eye phenotype when crossed to  
167 the *eya composite-GAL4* driver, 40 targeted genes that encode subunits of the ETC and ATP  
168 synthase (F-type) as defined by KEGG pathway dme00190 (Figure 2; Supplemental Table 4).  
169 These results indicate that eye development is quite sensitive to disruption of Complex I,  
170 Complex IV, and Complex V (F-type ATP-synthase), as nearly half of the transgenes that  
171 targeted these complexes induced an eye phenotype (Figure 2; Supplemental Tables 2 and 3). In  
172 addition, expression of the siRNA that targeted *Coenzyme Q biosynthesis protein 2 (Coq2*;  
173 FBgn0037574; BDSC 53276), which is required for Coenzyme Q production, and *Cytochrome C*  
174 *proximal (Cyt-c-p*; FBgn0284248; BDSC 64898) resulted in highly penetrant glossy-eye  
175 phenotypes (Figure 2; Supplemental Tables 2-4). We would also note that while expression of  
176 only one siRNA associated with Complex II or III induced a phenotype, our screen included  
177 relatively few strains that targeted these complexes.

178           Our findings regarding the ETC and ATP synthase are notable because, among the  
179 metabolism-associated TRiP transgenes capable of inducing an eye phenotype, those that disrupt  
180 OXPHOS represent one of the largest and most significantly enriched groups ( $p < 0.0001$ ,  
181 Fisher's exact test, two-tailed, 94 OXPHOS transgenes tested). Moreover, ETC-related  
182 transgenes were uniquely associated with the same morphological phenotype - not only did  
183 disruption of OXPHOS almost invariably induce a glossy-eye (Figure 3A-C; Supplemental Table  
184 4), but among the RNAi lines tested, almost all of the transgenes that resulted in a glossy-eye  
185 phenotype were associated with OXPHOS (Supplemental Tables 2 and 3). Overall, the  
186 phenotypic similarities displayed among the OXPHOS-associated TRiP lines support two  
187 previously state hypotheses (see MANDAL *et al.* 2005; LIAO *et al.* 2006): (1) ETC subunits  
188 influence eye development in a similar manner. (2) Considering that the function of many  
189 nuclear-encoded mitochondrial proteins remain unknown (PAGLIARINI *et al.* 2008; PAGLIARINI  
190 AND RUTTER 2013; CALVO *et al.* 2016), targeted disruption of these uncharacterized genes within  
191 the eye imaginal disc could potentially identify novel OXPHOS regulators by simply using the  
192 glossy-eye phenotype as a readout.

193

## 194 Glycosylphosphatidylinositol (GPI)-Anchor Synthesis

195 Many of the enzymes involved in GPI-anchor synthesis emerged as being essential for  
196 normal eye development. Of the 8 genes that are associated with this metabolic pathway (KEGG  
197 dme00563) and were examined during our screen, TRiP lines that targeted five of these genes  
198 induced rough eye phenotypes (Figure 4A-D; Supplemental Table 5). These enzymes represent  
199 multiple steps within GPI-anchor biosynthesis, which is consistent with previous observations  
200 that this pathway is essential for the function of key proteins involved in eye development,  
201 including *rhodopsin*, *chaoptin*, and *dally* (KRANTZ AND ZIPURSKY 1990; KUMAR AND READY  
202 1995; NAKATO *et al.* 1995; SATOH *et al.* 2013). Considering that the GPI-anchor biosynthetic  
203 enzymes would be predicted to emerge from a screen of this nature, these findings suggest that  
204 our approach effectively identified genes involved in eye development.

205

#### 206 Glycolysis and the TCA cycle

207 Expression of RNAi constructs targeting either glycolysis (KEGG dme00010) or the  
208 TCA cycle (KEGG dme00020) rarely affected eye development. Only two of the 40 TRiP lines  
209 that disrupt expression of glycolytic enzymes and none of the transgenes that targeted genes  
210 associated with the TCA cycle (n=27) induced an eye phenotype (Supplemental Tables 6 and 7).  
211 These results, while surprising, require confirmation using null alleles of these genes, as we can't  
212 eliminate the possibility that enzymes in glycolysis and the TCA cycle are so abundant that  
213 RNAi is incapable of reducing their expression below a threshold level. However, we would note  
214 that the eyes of *Mitochondrial Pyruvate Carrier 1* (*Mpc1*; FBgn0038662) mutants appear  
215 morphologically normal (Supplemental Figure 1B, BRICKER *et al.* 2012). Considering that *Mpc1*  
216 mutants are unable to transport pyruvate into their mitochondria, eye development must be able  
217 proceed normally when glycolysis is uncoupled from the TCA cycle (BRICKER *et al.* 2012).  
218 Secondly, we previously demonstrated that the TRiP line targeting *Phosphofructokinase* (*Pfk*;  
219 FBgn0003071; BDSC 34366) reduces *Pfk* mRNA levels by ~80%, significantly decreases  
220 pyruvate levels, and restricts larval growth (LI *et al.* 2018), however, *Pfk-RNAi* does not interfere  
221 with eye development (Supplemental Figure 1C). Although we have not yet confirmed the  
222 effectiveness of this *Pfk-RNAi* transgene in the eye imaginal disc, the absence of a phenotype in  
223 our screen is notable and warrants future analysis using *Pfk* loss-of-function mutations.

224 While additional studies are required to understand how glycolysis and the TCA cycle  
225 influence eye development, and we doubt that either pathway is completely dispensable in this

226 context, our results raise several intriguing hypotheses. Metabolomic studies of the *Mpc1*  
227 mutants reveal that fly larvae raised on standard media readily adapt to this severe disruption of  
228 central carbon metabolism (BRICKER *et al.* 2012). The same compensatory mechanisms that are  
229 activated in *Mpc1* mutants could also support eye development under conditions of reduced  
230 glycolytic flux. In addition, considering the apparent dependence of developing eye cells on  
231 catabolism of the amino acid glutamine (see below), glucose might not be the primary energy  
232 source used by these cells. Finally, we would note that when compared with other larval organs,  
233 such as the muscle and brain, imaginal discs express low levels of *Lactate Dehydrogenase*  
234 (dLdh, RECHSTEINER 1970; WANG *et al.* 2016). Therefore, glycolytic flux appears to be  
235 regulated differently in the eye when compared with other larval tissues (RECHSTEINER 1970).

236

### 237 Pentose Phosphate Pathway

238 Two enzymes within the oxidative shunt of the pentose phosphate pathway (KEGG  
239 dme0030), glucose-6-phosphate dehydrogenase (G6PDH; known as *Zwischenferment*;  
240 FBgn0004057; BDSC 50667) and phosphogluconate dehydrogenase (*Pgd*; FBgn0004654; BDSC  
241 65078) produced a small eye phenotype (Supplemental Tables 2 and 3). These results were  
242 unexpected because both enzymes are thought to be dispensable for growth and viability - *Zw*  
243 mutants display no discernable phenotype, and while *Pgd* mutants are lethal, *Zw Pgd* double  
244 mutant are viable with no obvious morphological defects (HUGHES AND LUCCHESI 1977). While  
245 such results require confirmation using clonal analysis, our observations hint at the possibility  
246 that tissue-specific disruption of the pentose phosphate pathway can induce developmental  
247 phenotypes – a phenomenon that has been previously observed in studies of *Drosophila*  
248 metabolism (CACERES *et al.* 2011). Considering that the oxidative branch of the pentose  
249 phosphate pathway serves a key role in maintaining NADPH levels (YING 2008), future studies  
250 should examine the possibility that eye development relies on G6PDH and PGD to maintain this  
251 pool of reducing equivalents.

252

### 253 Glutamine metabolism

254 Our screen revealed an unexpected role for glutamine (Gln) and glutamate (Glu) in eye  
255 development. Of the 24 TRiP lines that targeted genes directly involved in Gln/Glu metabolism  
256 (see enzymes that interact with Gln/Glu in KEGG pathway dme00250), five induced either a

257 small or no eye phenotype (Supplemental Table 8). These five RNAi lines targeted five genes  
258 that directly regulate Gln/Glu-dependent metabolic processes (Figure 5A):

259

260 (1) *bb8* (FBgn0039071; BDSC 57484) encodes the enzyme glutamate dehydrogenase  
261 (GLUD), which is responsible for converting glutamate into  $\alpha$ -ketoglutarate and  
262 ammonia (see KEGG dme00250). Because GLUD can funnel glutamate into the TCA  
263 cycle, this enzyme allows cells to generate both fatty acids and ATP in a glucose-  
264 independent manner – as is evident by the fact that many cancer cells adapt to inhibition  
265 of glycolysis by up-regulating GLUD activity (ALTMAN *et al.* 2016). A recent study in  
266 *Drosophila* has implicated *bb8* in promoting spermatogenesis (VEDELEK *et al.* 2016).

267

268 (2) *CG8132* (FBgn0037687; BDSC 57794) encodes an omega-amidase that is homologous to  
269 the human nitrilase family member 2 (NIT2) enzyme, which converts  $\alpha$ -ketoglutarate  
270 into  $\alpha$ -ketoglutarate and ammonia (JAISSON *et al.* 2009; KRASNIKOV *et al.* 2009). The  
271 endogenous function of this enzyme remains poorly understood in animal systems,  
272 however, there are some indications that NIT2 functions as a tumor suppressor in humans  
273 (ZHENG *et al.* 2015).

274

275 (3) Glutamine synthetase 1 (Gs1; FBgn0001142; BDSC 40836) generates Gln from ammonia  
276 and Glu (CAZZI AND RITOSSA 1983). Since Gln is required for several biosynthetic  
277 processes, including the production of nucleotides, glutathione, and glucosamine-6-  
278 phosphate (see below, ALTMAN *et al.* 2016), Gs1 ensures that growing and proliferating  
279 cells have adequate levels of this amino acid. In *Drosophila*, this enzyme is also required  
280 for early mitotic cycles within syncytial embryos (FRENZ AND GLOVER 1996).

281

282 (4) Glutamine:fructose-6-phosphate aminotransferase 2 (Gfat2; FBgn0039580; BDSC  
283 34740) converts Gln and fructose-6-phosphate into Glu and glucosamine-6-phosphate  
284 (GRAACK *et al.* 2001). In turn, glucosamine-6-phosphate is used to generate *N*-acetyl-  
285 glucosamine (GlcNAc), which is required for several cellular processes, including  
286 chitin formation and protein modifications. Moreover, the multifaceted roles for  
287 glucosamine-6-phosphate and GlcNAc in development are essential for cell



288 proliferation and tissue growth, as demonstrated by the recent observation that  
289 *Drosophila Gfat2* is required for proliferation of adult intestinal stem cells (MATTILA *et*  
290 *al.* 2018).

291  
292 (5) *phosphoribosylamidotransferase (Prat*; FBgn00049011; BDSC 43296) links Gln with  
293 purine biosynthesis (CLARK 1994). RNAi targeting of this gene in the eye imaginal disc  
294 resulted in a lethal phenotype during our initial screen (Supplemental Table 2),  
295 suggesting that disruption of nucleotide production in the developing eye induces non-  
296 autonomous effects. Our observation is consistent with previous results, which indicate  
297 that *Prat* is expressed in L3 imaginal discs and that *Prat-RNAi* results in a pupal lethality  
298 (JI AND CLARK 2006; BROWN *et al.* 2014).

299

300 In addition to the enzymes that are directly involved in Glu/Gln catabolism, RNAi of two  
301 additional genes associated with these amino acids elicited eye phenotypes:

302

303 (1)  $\gamma$ -glutamyl transpeptidase (*Ggt-1*; FBgn0030932; BDSC 64529) transfers a  $\gamma$ -glutamyl  
304 residue from a donor molecule, such as glutathione, to an acceptor molecule (IKEDA AND  
305 TANIGUCHI 2005; HEISTERKAMP *et al.* 2008). Moreover, this enzyme can generate Glu by  
306 using water as an acceptor molecule for  $\gamma$ -glutamyl (IKEDA AND TANIGUCHI 2005;  
307 HEISTERKAMP *et al.* 2008). *Drosophila Ggt-1* was previously reported to function in the  
308 larval Malpighian tubules, where it facilitates green-light avoidance by generating  
309 glutamate (LIU *et al.* 2014).

310

311 (2) *Selenide water dikinase (SelD*; FBgn0261270; BDSC 29553) encodes a member of the  
312 selenophosphate synthetase 1 (SPS1) enzyme family that does not synthesize  
313 selenophosphate but rather functions in redox homeostasis and glutathione metabolism  
314 (XU *et al.* 2007a; XU *et al.* 2007b; TOBE *et al.* 2016). Consistent with the proposed  
315 functions of SPS1 proteins, *SelD* serves a critical role in *Drosophila* eye development by  
316 restricting reactive oxygen species (ROS) accumulation (MOREY *et al.* 2003). In the  
317 absence of *SelD* function, elevated ROS levels within the eye interfere with a variety of  
318 developmental signaling events (ALSINA *et al.* 1999; MOREY *et al.* 2001), as evident by



319 the fact that the *SelD* null mutation *patufet* (*SelD<sup>patuf</sup>*) dominantly suppresses the eye and  
320 wing phenotypes induced by ectopic activation of *sevenless* and *Raf* (MOREY *et al.*  
321 2001). While the exact metabolic function of *SelD* remains unknown, *SelD* knockdown in  
322 SL2 cells induces excessive Gln accumulation (SHIM *et al.* 2009).

323  
324 We find these results notable because these seven enzymes are involved in a diversity of  
325 metabolic processes, including biosynthesis, energy production, and cell signaling. Moreover,  
326 not only are many of these enzymes implicated in cancer cell proliferation and tumor growth  
327 (LIN *et al.* 2007; ALTMAN *et al.* 2016), but one of the metabolites associated with these enzymes,  
328  $\alpha$ -ketoglutarate, is an essential regulator of histone methylation and gene expression (CHISOLM  
329 AND WEINMANN 2018). Overall, our findings indicate that *Drosophila* eye development could  
330 serve as a powerful *in vivo* model for investigating how Glu/Gln metabolism influences cell  
331 proliferation and tissue growth.

## 332 333 **DISCUSSION**

334 Here we use the *Drosophila* TRiP RNAi collection to identify metabolic processes that  
335 are required for the growth and development of the eye. Our screen not only verified that RNAi  
336 could effectively disrupt metabolic processes with known roles in eye development (e.g., *CoVa*,  
337 ETC subunits, enzymes involved in GPI-anchor biosynthesis), but also proved effective at  
338 identifying additional pathways that are essential for the growth of this tissue. Here we highlight  
339 two key findings that we believe warrant further examination.

### 340 341 Metabolic pathways are associated with specific developmental events

342 The RNAi phenotypes uncovered in our screen demonstrate how different stages in eye  
343 development impart unique demands on intermediary metabolism. For example (and as  
344 previously described by the Banerjee lab), the OXPHOS-associated glossy eye phenotype results  
345 from a cell cycle arrest during the second mitotic wave (MANDAL *et al.* 2005), resulting in the  
346 loss of pigment cells and lens secreting cone cells (for a review of cone and pigment cell  
347 development, see KUMAR 2012). A key feature of this phenotype is that the overall eye size  
348 remains normal, indicating that OXPHOS disruption does not interfere with cell proliferation  
349 ahead of the morphogenetic furrow. The unique nature of this phenotype suggests that any TRiP

350 line inducing a glossy, normal sized eye should be investigated for a potential role in OXPPOS.  
351 Similarly, the rough eye phenotype induced by RNAi of GPI-anchor biosynthesis likely reflects  
352 the disruption of proteins required for the formation of ommatidium, including those associated  
353 with morphogen signaling, cell polarity, and cell specification (KUMAR 2012). Therefore, those  
354 genes associated with a rough eye phenotype in our screen should be examined for potential  
355 roles in ommatidial assembly.

356 While our screen indicates that dozens of metabolic enzymes are required for eye  
357 development, perhaps our most intriguing results are the small/no eye phenotypes induced by the  
358 disruption of Glu/Gln metabolism. These developmental defects likely stem from either  
359 decreased cell proliferation ahead of the morphogenetic furrow or defects in cell fate  
360 specification (for review, see KUMAR 2011) and are consistent with the role of Glu/Gln-  
361 associated enzymes in mammalian cell proliferation and differentiation (ALTMAN *et al.* 2016).  
362 The developing eye disc, therefore, provides an ideal model to understand how signal  
363 transduction cascades regulates Glu/Gln metabolism and investigate how the metabolism of  
364 these amino acids influence cell proliferation and tissue growth. Moreover, considering that  
365 relatively few TRiP lines induced either a small eye or no eye, any gene associated with this  
366 phenotype should be examined for links with Glu/Gln metabolism. For example, RNAi targeting  
367 the *Drosophila* gene *jet fuel* (FBgn0033958; BDSC 43284) induces a small eye phenotype. This  
368 gene, which encodes a major facilitator superfamily transporter protein involved in nociception  
369 (HONJO *et al.* 2016), is uncharacterized during eye development. Based on the phenotypes  
370 observed in our screen, future studies should examine potential links between *jet fuel* function  
371 and Glu/Gln metabolism.

372

### 373 The *Drosophila* eye as a model for studying metabolic plasticity and robustness

374 Our screen further supports previous observations that *Drosophila* development is  
375 surprisingly resistant to metabolic insults. Our observation that eye development was largely  
376 unaffected by the RNAi transgenes that target glycolysis and the TCA cycle was unexpected.  
377 While we doubt that either pathway is completely dispensable for eye formation, our results are  
378 consistent with the ability of *Drosophila* development to withstand severe metabolic insults (e.g.,  
379 *Mpc1* mutants, BRICKER *et al.* 2012). This metabolic robustness makes sense because animal  
380 development must readily adapt to a variant of nutrient sources and environmental stresses.

381 Based upon the results of this screen, we propose that the fly eye could serve as a model to  
382 identify the compensatory pathways that that allow cell growth and proliferation to proceed in  
383 the face of major metabolic disruptions.

384 Overall, our genetic screen demonstrates how *Drosophila melanogaster* can serve as a  
385 powerful model to identify tissue-specific metabolic factors required for tissue growth and  
386 organogenesis. Moreover, we believe this work represents a necessary step toward systematically  
387 analyzing the metabolic pathways that support cell proliferation and tissue growth within the fly.  
388

389 **ACKNOWLEDGEMENTS**

390 We thank the TRiP at Harvard Medical School (NIH/NIGMS R01-GM084947) for providing  
391 transgenic RNAi fly stocks used in this study. We also thank the Bloomington *Drosophila* Stock  
392 Center (NIH P40OD018537), Cale Whitworth for helping us search the BDSC database, Flybase  
393 (NIH 5U41HG000739), and the members of the Kumar lab for providing reagents and technical  
394 support. Thanks to Kudakwashe Tshililiwa, Curteisha Jacobs, and Joy Morounfolu for assistance  
395 with genetic crosses. Special thanks to Bonnie Weasner and Justin Kumar for support, advice,  
396 helpful discussions, and a critical reading of the manuscript. J.M.T. is supported by the National  
397 Institute of General Medical Sciences of the National Institutes of Health under a R35 Maximizing  
398 Investigators' Research Award (MIRA; 1R35GM119557).

399

400

401

402 **FIGURE LEGENDS**

403

404 **Figure 1. Eye phenotypes caused by RNAi disruption of OXPHOS and growth control.** (A)  
405 An *eya composite-GAL4/+* control eye (*eya comp-GAL4*). (B) RNAi depletion of *CoVa*, targeted  
406 using BDSC 27548, resulted in a glossy-eyed phenotype. (C-D) TRiP RNAi transgenes targeting  
407 the growth control regulators (C) Tor, targeted using BDSC 33951, and (D) PTEN, targeted  
408 using BDSC 25967, induced small and large eyes, respectively. For all images, *eya composite-*  
409 *GAL4* is abbreviated *eye comp*.

410

411 **Figure 2. The ETC and ATP synthase are required for normal eye development.** (Top) A  
412 diagram illustrating the ETC and ATP synthase within the inner mitochondrial membrane.  
413 (Below) Individual subunits are listed in boxes and organized by complex. Yellow-shaded boxes  
414 indicate that at least one RNAi transgene targeting the subunit induced a phenotype. Grey-shaded  
415 boxes indicate that none of the RNAi transgenes targeting this subunit induced a phenotype.  
416 Corresponding data can be found in Supplemental Table 4. Diagram is a modified from the  
417 illustration presented on the KEGG website for pathway dme00190.

418

419 **Figure 3. Disruption of the ETC and ATP synthase induces a glossy-eye phenotype.**  
420 Representative images illustrating how RNAi depletion of OXPHOS components induce a  
421 glossy-eyed phenotype. (A) *ND-SGDH*, targeted using BDSC 67311. (B) *cype*, targeted using  
422 BDSC 33878. (C) *ATPsynβ*, targeted using BDSC 27712. For all images, *eya composite-GAL4* is  
423 abbreviated *eye comp*.

424

425 **Figure 4. Disruption of GPI-anchor biosynthesis induces a rough eye phenotype.** (A) A  
426 diagram illustrating GPI-anchor biosynthesis. Diagram is based upon KEGG pathway  
427 dme00563. Abbreviations: Phosphatidyl-1D-myo-inositol (PtdIns); Dolichyl phosphate D-  
428 mannose (DPM). (B-D) Representative images showing the rough eye phenotype caused by  
429 RNAi-induced disruption of (B) *PIG-H*, targeted using BDSC 67330, (C) *PIG-M*, targeted using  
430 BDSC 38321, and (D) *PIG-O*, targeted using BDSC 67247. For all images, *eya composite-GAL4*  
431 is abbreviated *eye comp*.

432

433 **Figure 5. Enzymes associated with glutamate (Glu) and glutamine (Gln) metabolism are**  
434 **essential for normal eye development.** (A) A diagram illustrating the metabolic reactions  
435 associated with Glu and Gln metabolism as defined by KEGG pathway dme00250. (B-E)  
436 Representative images illustrating how disruption of Glu/Gln metabolism affects eye  
437 development. Abbreviations: D-glucosamine-6-phosphate (GLCN-6-P) and 5-  
438 phosphoribosylamine (PRA). (B) *Bb8*, targeted using BDSC 57484. (C) *CG8132*, targeted using  
439 BDSC 38321. (D) *Gs1*, targeted using BDSC 40836. (E) *Gfat2*, targeted using BDSC 34740. For  
440 all images, *eya composite-GAL4* is abbreviated *eye comp*.  
441

## 442 LITERATURE CITED

- 443 Alsina, B., M. Corominas, M. J. Berry, J. Baguna and F. Serras, 1999 Disruption of  
444 selenoprotein biosynthesis affects cell proliferation in the imaginal discs and brain  
445 of *Drosophila melanogaster*. *J Cell Sci* 112 ( Pt 17): 2875-2884.
- 446 Altman, B. J., Z. E. Stine and C. V. Dang, 2016 From Krebs to clinic: glutamine metabolism to  
447 cancer therapy. *Nat Rev Cancer* 16: 619-634.
- 448 Beadle, G. W., and B. Ephrussi, 1936 The Differentiation of Eye Pigments in *Drosophila* as  
449 Studied by Transplantation. *Genetics* 21: 225-247.
- 450 Bohni, R., J. Riesgo-Escovar, S. Oldham, W. Brogiolo, H. Stocker *et al.*, 1999 Autonomous  
451 control of cell and organ size by CHICO, a *Drosophila* homolog of vertebrate IRS1-4.  
452 *Cell* 97: 865-875.
- 453 Bricker, D. K., E. B. Taylor, J. C. Schell, T. Orsak, A. Boutron *et al.*, 2012 A mitochondrial  
454 pyruvate carrier required for pyruvate uptake in yeast, *Drosophila*, and humans.  
455 *Science* 337: 96-100.
- 456 Brown, J. B., N. Boley, R. Eisman, G. E. May, M. H. Stoiber *et al.*, 2014 Diversity and dynamics  
457 of the *Drosophila* transcriptome. *Nature* 512: 393-399.
- 458 Caceres, L., A. S. Necakov, C. Schwartz, S. Kimber, I. J. Roberts *et al.*, 2011 Nitric oxide  
459 coordinates metabolism, growth, and development via the nuclear receptor E75.  
460 *Genes Dev* 25: 1476-1485.
- 461 Caizzi, R., and F. Ritossa, 1983 The enzyme glutamine synthetase I of *Drosophila*  
462 *melanogaster* is associated with a modified RNA. *Biochem Genet* 21: 267-285.
- 463 Calvo, S. E., K. R. Clauser and V. K. Mootha, 2016 MitoCarta2.0: an updated inventory of  
464 mammalian mitochondrial proteins. *Nucleic Acids Res* 44: D1251-1257.
- 465 Chen, C., J. Jack and R. S. Garofalo, 1996 The *Drosophila* insulin receptor is required for  
466 normal growth. *Endocrinology* 137: 846-856.
- 467 Chisolm, D. A., and A. S. Weinmann, 2018 Connections Between Metabolism and Epigenetics  
468 in Programming Cellular Differentiation. *Annu Rev Immunol* 36: 221-246.
- 469 Clark, D. V., 1994 Molecular and genetic analyses of *Drosophila* *Prat*, which encodes the first  
470 enzyme of de novo purine biosynthesis. *Genetics* 136: 547-557.
- 471 Dickinson, W. J., and D. T. Sullivan, 1975 *Gene-Enzyme Systems in Drosophila*. Springer-  
472 Verlag, Heidelberg.
- 473 Duncan, D. M., P. Kiefel and I. Duncan, 2017 Mutants for *Drosophila* *Isocitrate*  
474 *Dehydrogenase 3b* Are Defective in Mitochondrial Function and Larval Cell Death. *G3*  
475 (Bethesda) 7: 789-799.
- 476 Frenz, L. M., and D. M. Glover, 1996 A maternal requirement for glutamine synthetase I for  
477 the mitotic cycles of syncytial *Drosophila* embryos. *J Cell Sci* 109 ( Pt 11): 2649-  
478 2660.
- 479 Gao, X., T. P. Neufeld and D. Pan, 2000 *Drosophila* PTEN regulates cell growth and  
480 proliferation through PI3K-dependent and -independent pathways. *Dev Biol* 221:  
481 404-418.
- 482 Goberdhan, D. C., N. Paricio, E. C. Goodman, M. Mlodzik and C. Wilson, 1999 *Drosophila*  
483 tumor suppressor PTEN controls cell size and number by antagonizing the  
484 Chico/PI3-kinase signaling pathway. *Genes Dev* 13: 3244-3258.



- 485 Graack, H. R., U. Cinque and H. Kress, 2001 Functional regulation of glutamine:fructose-6-  
486 phosphate aminotransferase 1 (GFAT1) of *Drosophila melanogaster* in a UDP-N-  
487 acetylglucosamine and cAMP-dependent manner. *Biochem J* 360: 401-412.
- 488 Heisterkamp, N., J. Groffen, D. Warburton and T. P. Sneddon, 2008 The human gamma-  
489 glutamyltransferase gene family. *Hum Genet* 123: 321-332.
- 490 Honjo, K., S. E. Mauthner, Y. Wang, J. H. P. Skene and W. D. Tracey, Jr., 2016 Nociceptor-  
491 Enriched Genes Required for Normal Thermal Nociception. *Cell Rep* 16: 295-303.
- 492 Huang, H., C. J. Potter, W. Tao, D. M. Li, W. Brogiolo *et al.*, 1999 PTEN affects cell size, cell  
493 proliferation and apoptosis during *Drosophila* eye development. *Development* 126:  
494 5365-5372.
- 495 Hughes, M. B., and J. C. Lucchesi, 1977 Genetic rescue of a lethal "null" activity allele of 6-  
496 phosphogluconate dehydrogenase in *Drosophila melanogaster*. *Science* 196: 1114-  
497 1115.
- 498 Ikeda, Y., and N. Taniguchi, 2005 Gene expression of gamma-glutamyltranspeptidase.  
499 *Methods Enzymol* 401: 408-425.
- 500 Ito, N., and G. M. Rubin, 1999 *gigas*, a *Drosophila* homolog of tuberous sclerosis gene  
501 product-2, regulates the cell cycle. *Cell* 96: 529-539.
- 502 Jaisson, S., M. Veiga-da-Cunha and E. Van Schaftingen, 2009 Molecular identification of  
503 omega-amidase, the enzyme that is functionally coupled with glutamine  
504 transaminases, as the putative tumor suppressor Nit2. *Biochimie* 91: 1066-1071.
- 505 Ji, Y., and D. V. Clark, 2006 The purine synthesis gene *Prat2* is required for *Drosophila*  
506 metamorphosis, as revealed by inverted-repeat-mediated RNA interference.  
507 *Genetics* 172: 1621-1631.
- 508 Kanehisa, M., 2017 Enzyme Annotation and Metabolic Reconstruction Using KEGG.  
509 *Methods Mol Biol* 1611: 135-145.
- 510 Kanehisa, M., Y. Sato, M. Furumichi, K. Morishima and M. Tanabe, 2019 New approach for  
511 understanding genome variations in KEGG. *Nucleic Acids Res* 47: D590-D595.
- 512 Krantz, D. E., and S. L. Zipursky, 1990 *Drosophila* chaoptin, a member of the leucine-rich  
513 repeat family, is a photoreceptor cell-specific adhesion molecule. *EMBO J* 9: 1969-  
514 1977.
- 515 Krasnikov, B. F., C. H. Chien, R. Nostramo, J. T. Pinto, E. Nieves *et al.*, 2009 Identification of  
516 the putative tumor suppressor Nit2 as omega-amidase, an enzyme metabolically  
517 linked to glutamine and asparagine transamination. *Biochimie* 91: 1072-1080.
- 518 Kumar, J. P., 2011 My what big eyes you have: how the *Drosophila* retina grows. *Dev*  
519 *Neurobiol* 71: 1133-1152.
- 520 Kumar, J. P., 2012 Building an ommatidium one cell at a time. *Dev Dyn* 241: 136-149.
- 521 Kumar, J. P., 2018 The fly eye: Through the looking glass. *Dev Dyn* 247: 111-123.
- 522 Kumar, J. P., and D. F. Ready, 1995 Rhodopsin plays an essential structural role in  
523 *Drosophila* photoreceptor development. *Development* 121: 4359-4370.
- 524 Li, H., A. J. Hurlburt and J. M. Tennessen, 2018 A *Drosophila* model of combined D-2- and L-  
525 2-hydroxyglutaric aciduria reveals a mechanism linking mitochondrial citrate  
526 export with oncometabolite accumulation. *Dis Model Mech* 11.
- 527 Liao, T. S., G. B. Call, P. Guptan, A. Cespedes, J. Marshall *et al.*, 2006 An efficient genetic  
528 screen in *Drosophila* to identify nuclear-encoded genes with mitochondrial function.  
529 *Genetics* 174: 525-533.



- 530 Lin, C. H., M. Y. Chung, W. B. Chen and C. H. Chien, 2007 Growth inhibitory effect of the  
531 human NIT2 gene and its allelic imbalance in cancers. *FEBS J* 274: 2946-2956.
- 532 Lindsley, D., and G. Zimm, 1992 *The Genome of Drosophila melanogaster*. Academic Press,  
533 Inc., San Diego, CA.
- 534 Liu, J., Z. Gong and L. Liu, 2014 gamma-glutamyl transpeptidase 1 specifically suppresses  
535 green-light avoidance via GABAA receptors in *Drosophila*. *J Neurochem* 130: 408-  
536 418.
- 537 Mandal, S., P. Guptan, E. Owusu-Ansah and U. Banerjee, 2005 Mitochondrial regulation of  
538 cell cycle progression during development as revealed by the tenured mutation in  
539 *Drosophila*. *Dev Cell* 9: 843-854.
- 540 Mattila, J., K. Kokki, V. Hietakangas and M. Boutros, 2018 Stem Cell Intrinsic Hexosamine  
541 Metabolism Regulates Intestinal Adaptation to Nutrient Content. *Dev Cell* 47: 112-  
542 121 e113.
- 543 Morey, M., M. Corominas and F. Serras, 2003 DIAP1 suppresses ROS-induced apoptosis  
544 caused by impairment of the selD/sps1 homolog in *Drosophila*. *J Cell Sci* 116: 4597-  
545 4604.
- 546 Morey, M., F. Serras, J. Baguna, E. Hafen and M. Corominas, 2001 Modulation of the  
547 Ras/MAPK signalling pathway by the redox function of selenoproteins in *Drosophila*  
548 *melanogaster*. *Dev Biol* 238: 145-156.
- 549 Nakato, H., T. A. Futch and S. B. Selleck, 1995 The division abnormally delayed (dally) gene:  
550 a putative integral membrane proteoglycan required for cell division patterning  
551 during postembryonic development of the nervous system in *Drosophila*.  
552 *Development* 121: 3687-3702.
- 553 Oldham, S., J. Montagne, T. Radimerski, G. Thomas and E. Hafen, 2000 Genetic and  
554 biochemical characterization of dTOR, the *Drosophila* homolog of the target of  
555 rapamycin. *Genes Dev* 14: 2689-2694.
- 556 Pagliarini, D. J., S. E. Calvo, B. Chang, S. A. Sheth, S. B. Vafai *et al.*, 2008 A mitochondrial  
557 protein compendium elucidates complex I disease biology. *Cell* 134: 112-123.
- 558 Pagliarini, D. J., and J. Rutter, 2013 Hallmarks of a new era in mitochondrial biochemistry.  
559 *Genes Dev* 27: 2615-2627.
- 560 Perkins, L. A., L. Holderbaum, R. Tao, Y. Hu, R. Sopko *et al.*, 2015 The Transgenic RNAi  
561 Project at Harvard Medical School: Resources and Validation. *Genetics* 201: 843-  
562 852.
- 563 Potter, C. J., H. Huang and T. Xu, 2001 *Drosophila* Tsc1 functions with Tsc2 to antagonize  
564 insulin signaling in regulating cell growth, cell proliferation, and organ size. *Cell*  
565 105: 357-368.
- 566 Rechsteiner, M. C., 1970 *Drosophila* lactate dehydrogenase and alpha-glycerolphosphate  
567 dehydrogenase: distribution and change in activity during development. *J Insect*  
568 *Physiol* 16: 1179-1192.
- 569 Satoh, T., T. Inagaki, Z. Liu, R. Watanabe and A. K. Satoh, 2013 GPI biosynthesis is essential  
570 for rhodopsin sorting at the trans-Golgi network in *Drosophila* photoreceptors.  
571 *Development* 140: 385-394.
- 572 Shim, M. S., J. Y. Kim, H. K. Jung, K. H. Lee, X. M. Xu *et al.*, 2009 Elevation of glutamine level  
573 by selenophosphate synthetase 1 knockdown induces megamitochondrial formation  
574 in *Drosophila* cells. *J Biol Chem* 284: 32881-32894.

- 575 Tennessen, J. M., N. M. Bertagnolli, J. Evans, M. H. Sieber, J. Cox *et al.*, 2014 Coordinated  
576 metabolic transitions during *Drosophila* embryogenesis and the onset of aerobic  
577 glycolysis. *G3 (Bethesda)* 4: 839-850.
- 578 Tobe, R., B. A. Carlson, J. H. Huh, N. P. Castro, X. M. Xu *et al.*, 2016 Selenophosphate  
579 synthetase 1 is an essential protein with roles in regulation of redox homeostasis  
580 in mammals. *Biochem J* 473: 2141-2154.
- 581 Vedelek, V., B. Laurinyecz, A. L. Kovacs, G. Juhasz and R. Sinka, 2016 Testis-Specific Bb8 Is  
582 Essential in the Development of Spermatid Mitochondria. *PLoS One* 11: e0161289.
- 583 Verdu, J., M. A. Buratovich, E. L. Wilder and M. J. Birnbaum, 1999 Cell-autonomous  
584 regulation of cell and organ growth in *Drosophila* by Akt/PKB. *Nat Cell Biol* 1: 500-  
585 506.
- 586 Wang, C. W., A. Purkayastha, K. T. Jones, S. K. Thaker and U. Banerjee, 2016 In vivo genetic  
587 dissection of tumor growth and the Warburg effect. *Elife* 5.
- 588 Wang, L., J. Evans, H. K. Andrews, R. B. Beckstead, C. S. Thummel *et al.*, 2008 A genetic  
589 screen identifies new regulators of steroid-triggered programmed cell death in  
590 *Drosophila*. *Genetics* 180: 269-281.
- 591 Wang, L., G. Lam and C. S. Thummel, 2010 Med24 and Mdh2 are required for *Drosophila*  
592 larval salivary gland cell death. *Dev Dyn* 239: 954-964.
- 593 Weasner, B. M., B. P. Weasner, S. D. Neuman, A. Bashirullah and J. P. Kumar, 2016 Retinal  
594 Expression of the *Drosophila eyes absent* Gene Is Controlled by Several  
595 Cooperatively Acting Cis-regulatory Elements. *PLoS Genet* 12: e1006462.
- 596 Weinkove, D., T. P. Neufeld, T. Twardzik, M. D. Waterfield and S. J. Leever, 1999 Regulation  
597 of imaginal disc cell size, cell number and organ size by *Drosophila* class I(A)  
598 phosphoinositide 3-kinase and its adaptor. *Curr Biol* 9: 1019-1029.
- 599 Xu, X. M., B. A. Carlson, R. Irons, H. Mix, N. Zhong *et al.*, 2007a Selenophosphate synthetase 2  
600 is essential for selenoprotein biosynthesis. *Biochem J* 404: 115-120.
- 601 Xu, X. M., B. A. Carlson, H. Mix, Y. Zhang, K. Saira *et al.*, 2007b Biosynthesis of selenocysteine  
602 on its tRNA in eukaryotes. *PLoS Biol* 5: e4.
- 603 Ying, W., 2008 NAD<sup>+</sup>/NADH and NADP<sup>+</sup>/NADPH in cellular functions and cell death:  
604 regulation and biological consequences. *Antioxid Redox Signal* 10: 179-206.
- 605 Zheng, B., R. Chai and X. Yu, 2015 Downregulation of NIT2 inhibits colon cancer cell  
606 proliferation and induces cell cycle arrest through the caspase-3 and PARP  
607 pathways. *Int J Mol Med* 35: 1317-1322.
- 608
- 609

610 **Supplemental Figure 1. Most TRiP RNAi lines that target glycolysis do not disrupt eye**  
611 **development.** (A) All enzymatic steps in glycolysis were targeted during the course of the  
612 screen. Yellow-shaded boxes indicate that at least one RNAi transgene targeting the enzyme  
613 induced a phenotype. Grey-shaded boxes indicate that none of the RNAi transgenes targeting this  
614 subunit induced a phenotype. Corresponding data can be found in Supplemental Table 6.  
615 Diagram is modified from the pathway illustrating KEGG pathway dme00010. (B) *w<sup>1118</sup>; Mpc1<sup>l</sup>*  
616 mutant eyes are morphologically normal, indicating that glucose oxidations is not required  
617 during eye development. (C) RNAi targeting *Pfk* using BDSC 34366 failed to induce an eye  
618 phenotype. *eya composite-GAL4* is abbreviated *eye comp*.

619

620 **Supplemental Figure 2. TRiP RNAi lines targeting the TCA cycle do not disrupt eye**  
621 **development.** Grey-shaded boxes indicate that none of the RNAi transgenes targeting this  
622 enzyme induced a phenotype. Corresponding data can be found in Supplemental Table 7.  
623 Diagram is a modified from the pathway illustrating KEGG pathway dme00020.

624

625 **Supplemental Table 1.** A list of *Drosophila* genes involved in metabolism and nutrient sensing

626 **Supplemental Table 2.** Results of TRiP RNAi metabolism screen\_Trial 1

627 **Supplemental Table 3.** Results of TRiP RNAi metabolism screen\_Trial 2

628 **Supplemental Table 4.** A list of the BDSC TRiP RNAi strains that were used to disrupt  
629 oxidative phosphorylation

630 **Supplemental Table 5.** A list of the BDSC TRiP strains that were used to disrupt GPI-anchor  
631 biosynthesis.

632 **Supplemental Table 6.** A list of the BDSC TRiP strains that were used to disrupt glycolysis.

633 **Supplemental Table 7.** A list of the BDSC TRiP strains that were used to disrupt the TCA  
634 cycle.

635 **Supplemental Table 8.** A list of the BDSC TRiP strains that were used to disrupt glutamate and  
636 glutamine metabolism.

637

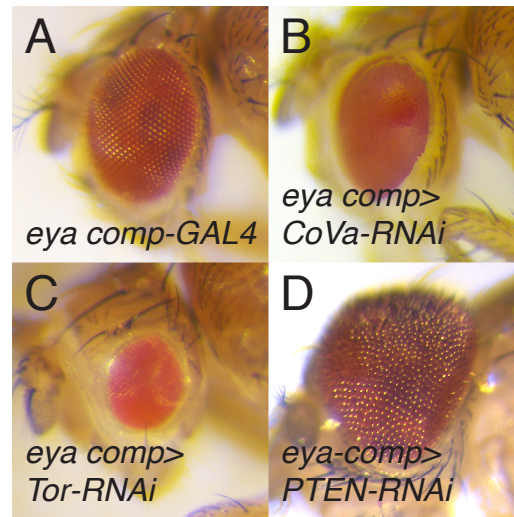

**Figure 1. Eye phenotypes caused by RNAi disruption of OXPHOS and growth control.** When compared with (A) an *eya composite-GAL4/+* control eye (*eya comp-GAL4*), RNAi depletion of (B) *CoVa*, targeted using BDSC 27548, resulted in a glossy-eyed phenotype. TRiP RNAi transgenes targeting the growth control regulators (C) *Tor*, targeted using BDSC 33951, and (D) *PTEN*, targeted using BDSC 25967, induced small and large eyes, respectively. For all images, *eya composite-GAL4* is abbreviated *eye comp*.

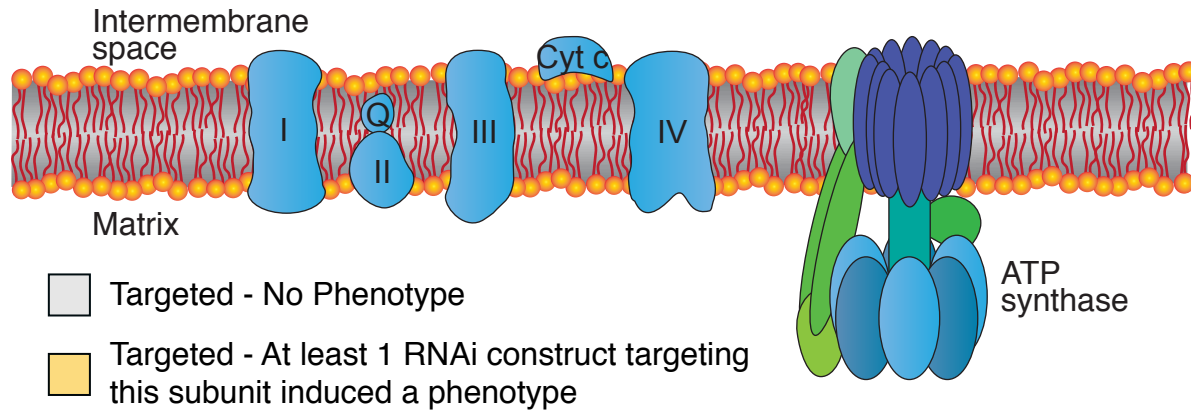

#### Complex I (NADH Dehydrogenase)

|        |         |          |         |         |         |        |        |
|--------|---------|----------|---------|---------|---------|--------|--------|
| ND1    | ND2     | ND3      | ND4     | ND4L    | ND5     | ND6    |        |
| Ndufs1 | Ndufs2  | Ndufs3   | Ndufs4  | Ndufs5  | Ndufs6  | Ndufs7 | Ndufs8 |
| Ndufa1 | Ndufa2  | Ndufa4   | Ndufa5  | Ndufa6  | Ndufa7  | Ndufa8 |        |
| Ndufa9 | Ndufa10 | Ndufab1  | Ndufa11 | Ndufa12 | Ndufa13 |        |        |
| Ndufb1 | Ndufb2  | Ndufb3   | Ndufb4  | Ndufb5  | Ndufb6  | Ndufb7 |        |
| Ndufb8 | Ndufb9  | Ndufb10* | Ndufb11 | Ndufc1  |         |        |        |
| Ndufv1 | Ndufv2  |          |         |         |         |        |        |

#### Complex II (Succinate Dehydrogenase/Fumarate Reductase)

|      |      |      |      |
|------|------|------|------|
| SDHA | SDHB | SDHC | SDHD |
|------|------|------|------|

#### Complex III (Cytochrome C Reductase)

|      |       |       |      |      |       |  |  |
|------|-------|-------|------|------|-------|--|--|
| ISP  | Cyt b | Cyt 1 |      |      |       |  |  |
| QCR2 | QCR6  | QCR7  | QCR8 | QCR9 | QCR10 |  |  |

Cytochrome C

|       |
|-------|
| Cyt-c |
|-------|

#### Complex IV (Cytochrome C Oxidase)

|       |       |       |       |        |       |
|-------|-------|-------|-------|--------|-------|
| COX1  | COX2  | COX3  | COX4  | COX5A* | COX5B |
| COX6A | COX6B | COX6C | COX7A | COX7C  | COX8  |
| COX10 | COX11 | COX15 | COX17 | CyoE   |       |

#### Complex V (F-type ATP synthase)

|       |      |       |       |         |      |   |   |
|-------|------|-------|-------|---------|------|---|---|
| alpha | beta | gamma | delta | epsilon | OSCP | a | b |
| c     | d    | e     | f     | g       | f6/h | g |   |

**Figure 2. The ETC and ATP synthase are required for normal eye development.** (Top) A diagram illustrating the ETC and ATP synthase within the inner mitochondrial membrane. (Below) Individual subunits are listed in boxes and organized by complex. Yellow-shaded boxes indicate that at least one RNAi transgene targeting the subunit induced a phenotype. Grey-shaded boxes indicate that none of the RNAi transgenes targeting this subunit induced a phenotype. Corresponding data can be found in Supplemental Table 4. Diagram is a modified from the illustration presented on the KEGG website for pathway dme00190.

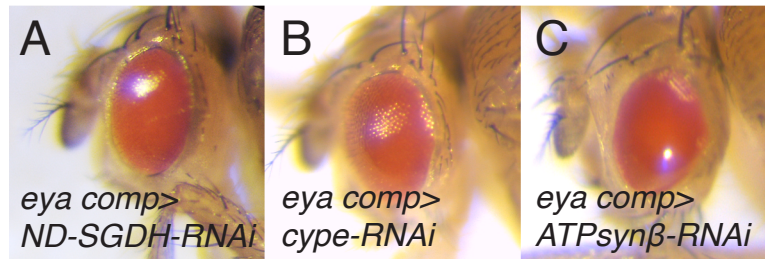

**Figure 3. Disruption of the ETC and ATP synthase induces a glossy-eye phenotype.** Representative images illustrating how RNAi depletion of OXPHOS components induce a glossy-eyed phenotype. (A) *ND-SGDH*, targeted using BDSC 67311. (B) *cype*, targeted using BDSC 33878. (C) *ATPsynβ*, targeted using BDSC 27712. For all images, *eya composite-GAL4* is abbreviated *eye comp*.



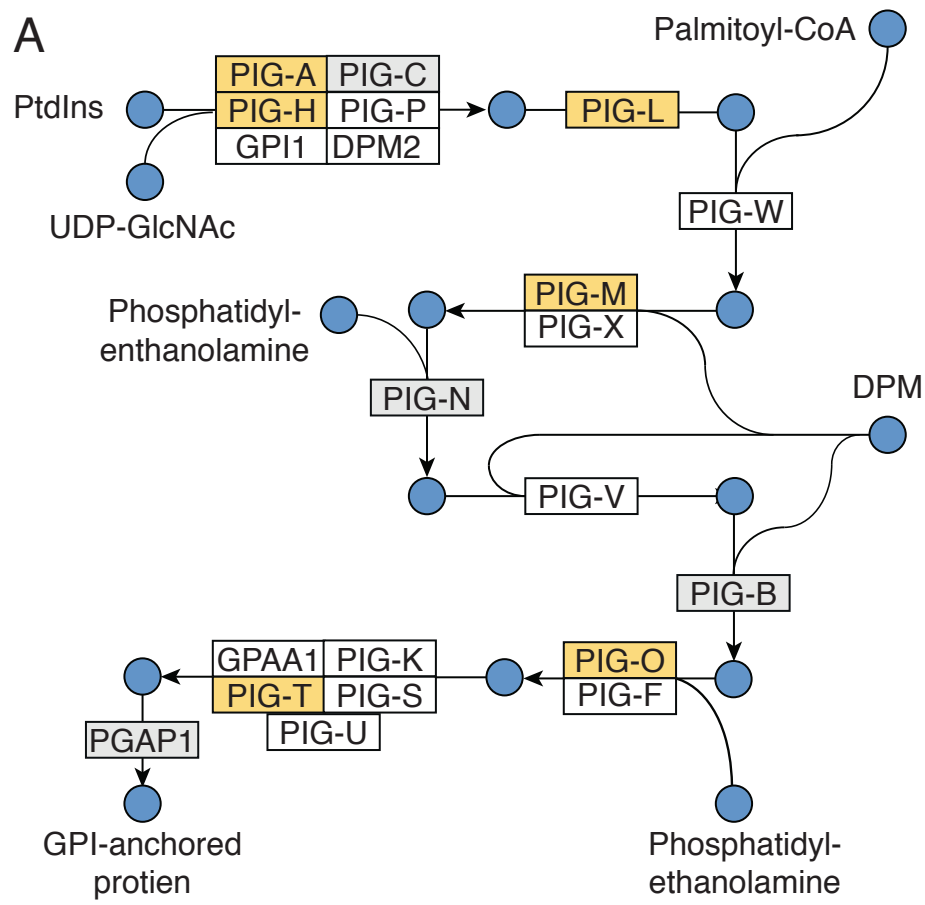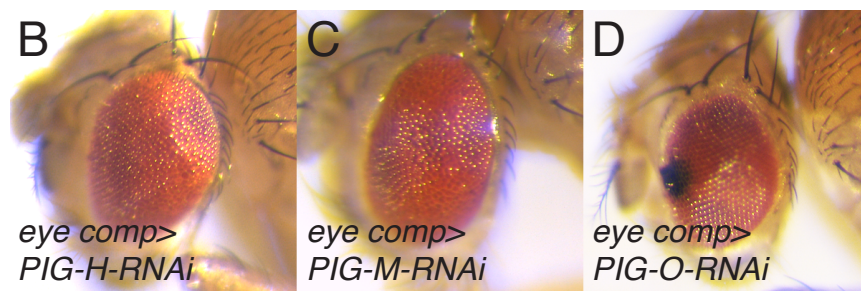

**Figure 4. Disruption of GPI-anchor biosynthesis induces a rough eye phenotype.**

(A) A diagram illustrating GPI-anchor biosynthesis. Diagram is based upon KEGG pathway dme00563. Abbreviations: Phosphatidyl-1D-myo-inositol (PtdIns); Dolichyl phosphate D-mannose (DPM). (B-D) Representative images showing the rough eye phenotype caused by RNAi-induced disruption of (B) *PIG-H*, targeted using BDSC 67330, (C) *PIG-M*, targeted using BDSC 38321, and (D) *PIG-O*, targeted using BDSC 67247. For all images, *eya composite-GAL4* is abbreviated *eye comp*.

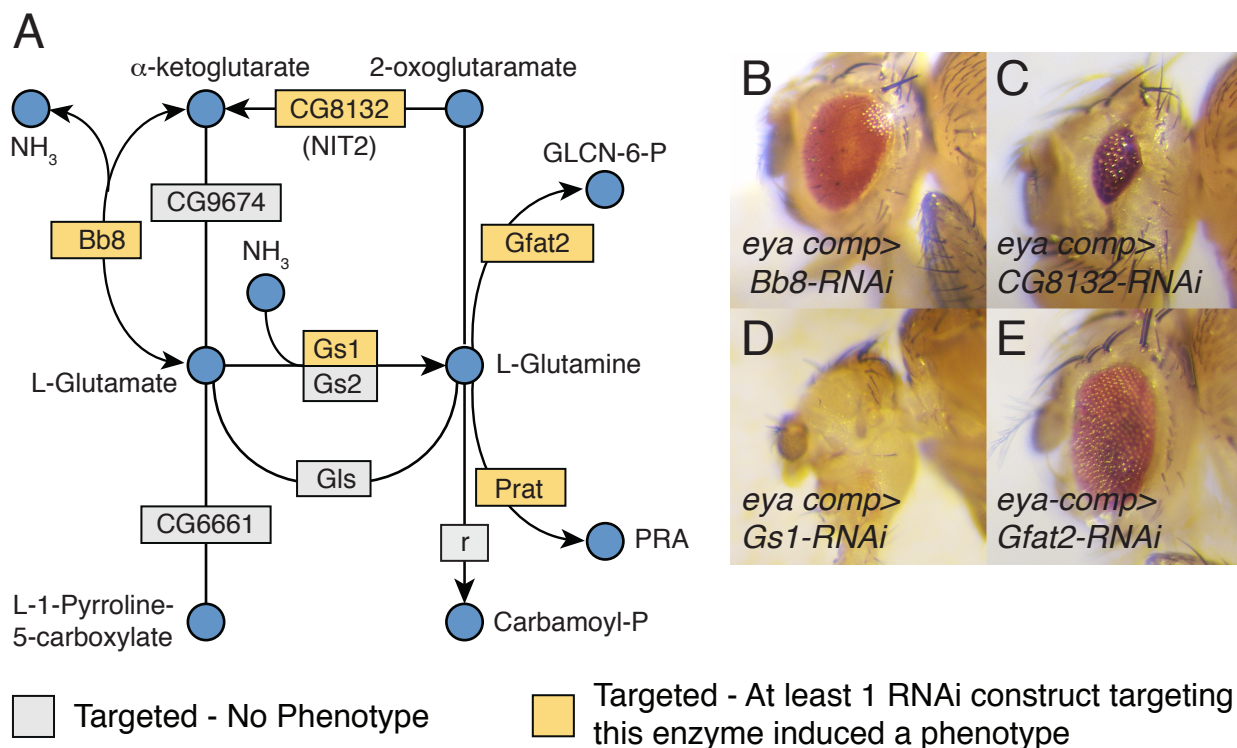

**Figure 5. Enzymes associated with glutamate (Glu) and glutamine (Gln) metabolism are essential for normal eye development.** (A) A diagram illustrating the metabolic reactions associated with Glu and Gln metabolism as defined by KEGG pathway dme00250. (B-E) Representative images illustrating how disruption of Glu/Gln metabolism affects eye development. Abbreviations: D-glucosamine-6-phosphate (GLCN-6-P) and 5-phosphoribosylamine (PRA). (B) *Bb8*, targeted using BDSC 57484. (C) *CG8132*, targeted using BDSC 38321. (D) *Gs1*, targeted using BDSC 40836. (E) *Gfat2*, targeted using BDSC 34740. For all images, *eya composite-GAL4* is abbreviated *eya comp*.



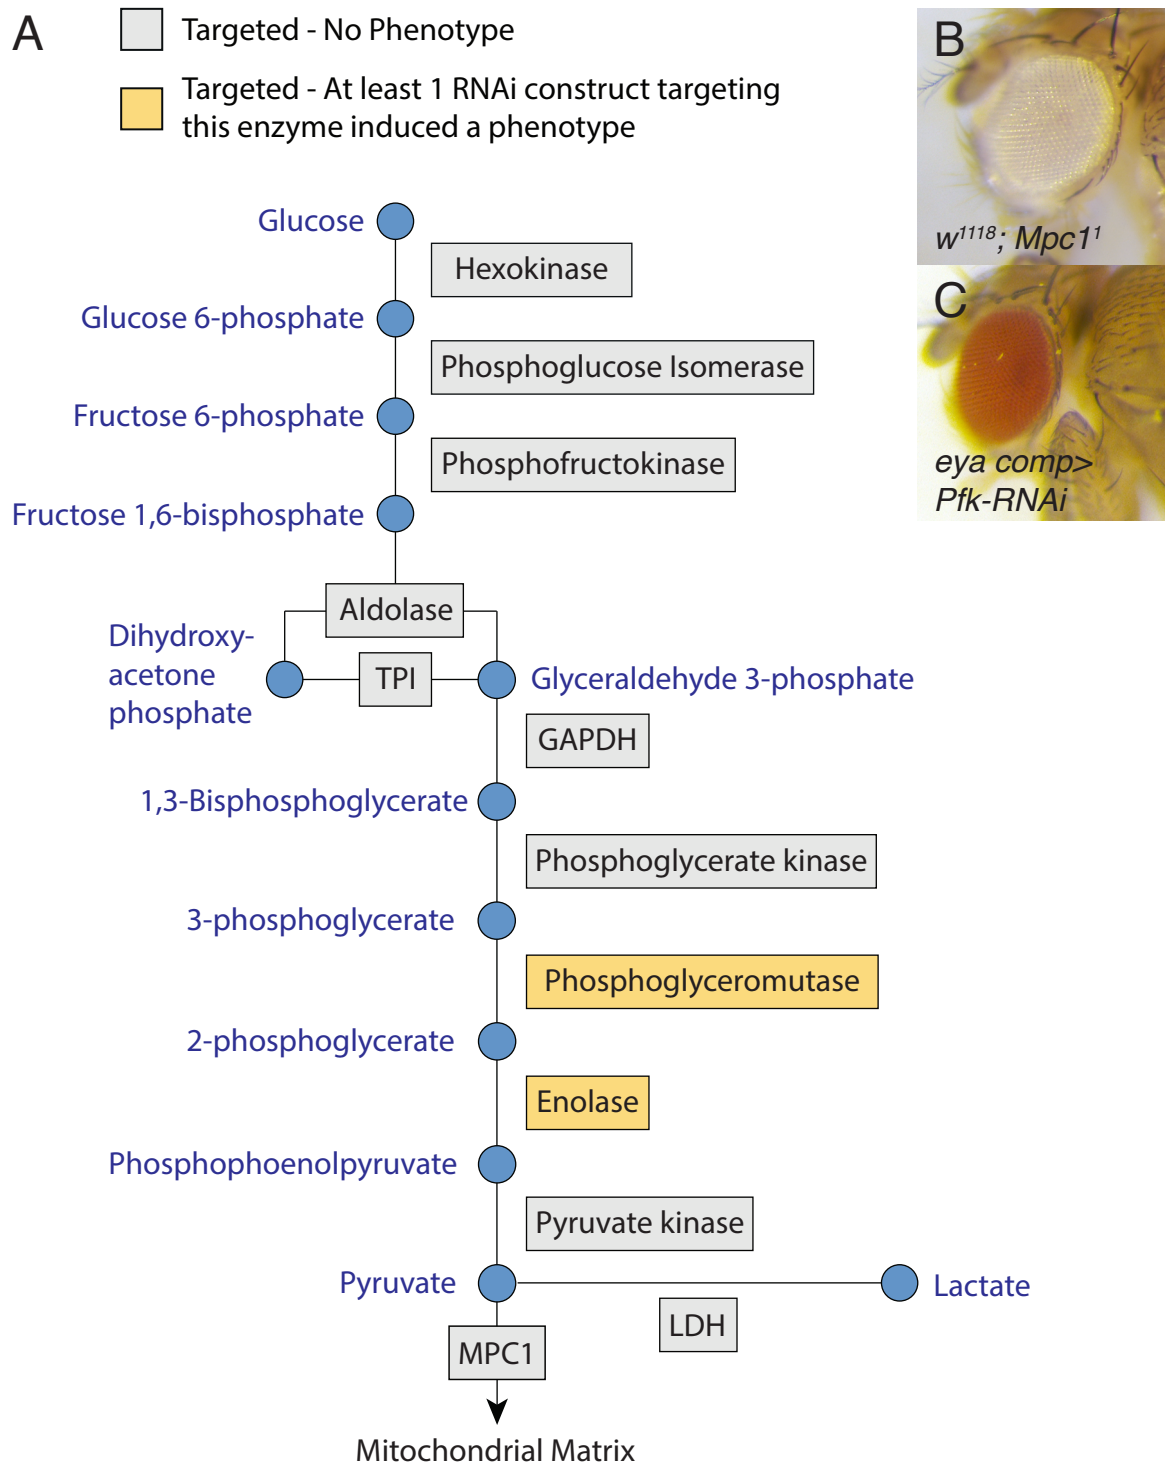

**Supplemental Figure 1. Most TRiP RNAi lines that target glycolysis do not disrupt eye development.** (A) All enzymatic steps in glycolysis were targeted during the course of the screen. Yellow-shaded boxes indicate that at least one RNAi transgene targeting the enzyme induced a phenotype. Grey-shaded boxes indicate that none of the RNAi transgenes targeting this subunit induced a phenotype. Corresponding data can be found in Supplemental Table 6. Diagram is modified from the pathway illustrating KEGG pathway dme00010. (B) *w<sup>1118</sup>; Mpc1<sup>1</sup>* mutant eyes are morphologically normal, indicating that glucose oxidations is not required during eye development. (C) RNAi targeting *Pfk* using BDSC 34366 failed to induce an eye phenotype. *eya composite-GAL4* is abbreviated *eya comp*.

Targeted - No Phenotype

Targeted - At least 1 RNAi construct targeting this enzyme induced a phenotype

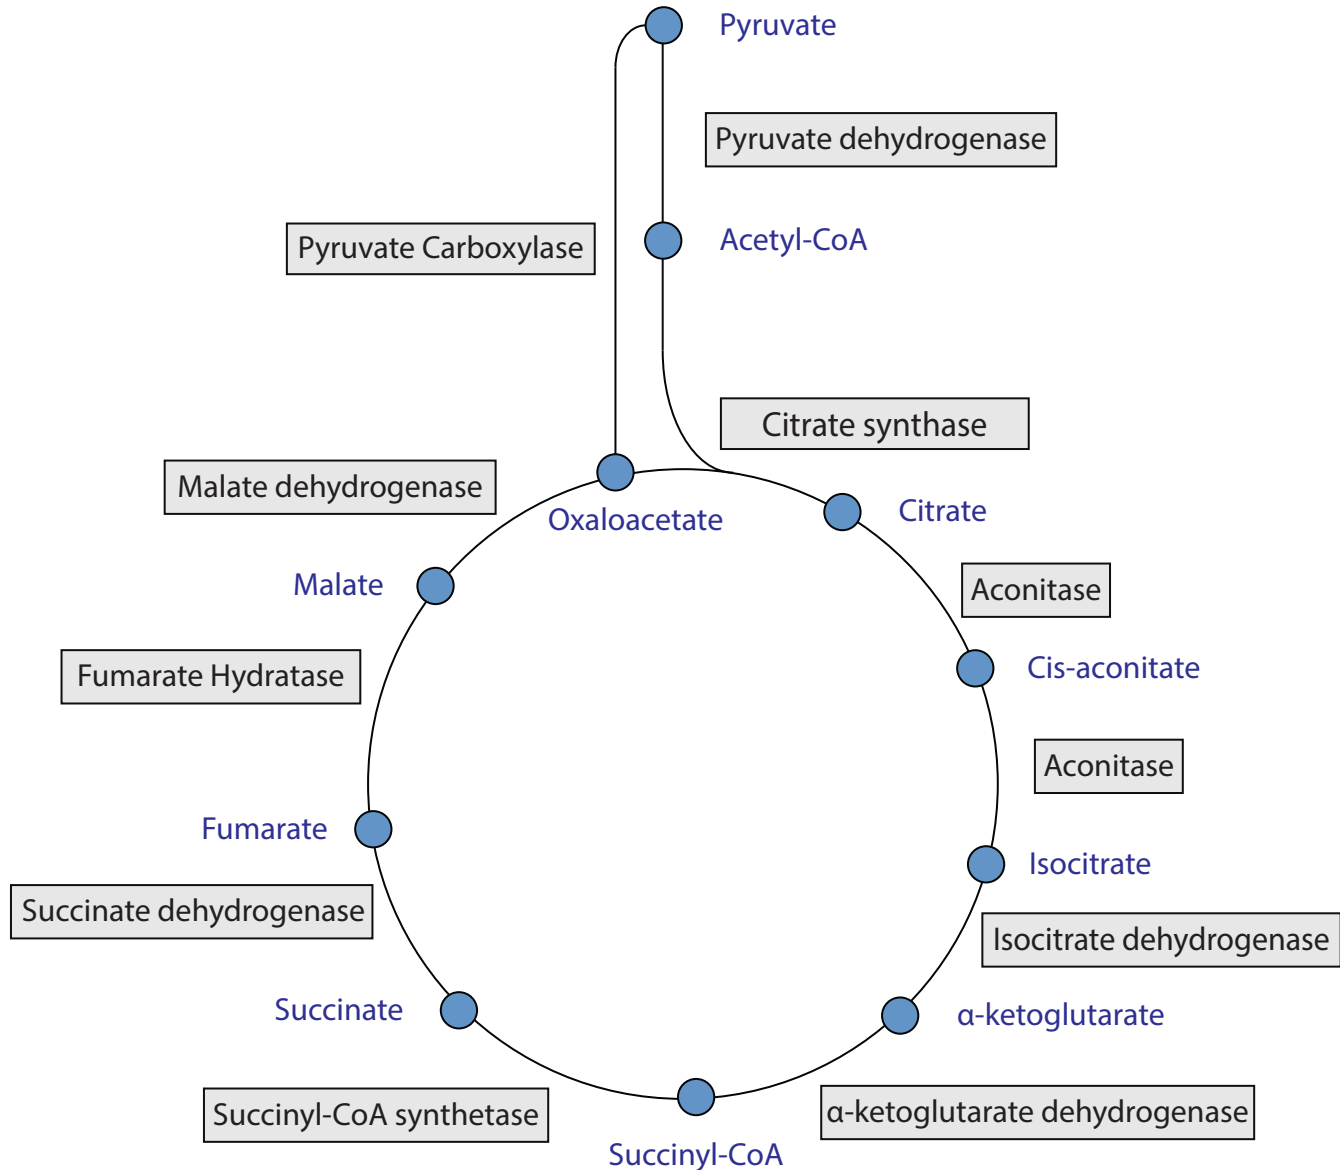

**Supplemental Figure 2. TRiP RNAi lines targeting the TCA cycle do not disrupt eye development.** Grey-shaded boxes indicate that none of the RNAi transgenes targeting this enzyme induced a phenotype. Corresponding data can be found in Supplemental Table 7. Diagram is a modified from the pathway illustrating KEGG pathway dme00020.
