# Supplementary material for: A genetic screen using the Drosophila melanogaster TRiP RNAi collection to identify metabolic enzymes required for eye development
Source: bioRxiv preprint, doi:10.1101/582940, version 1 (2019-03-19)
Supplement: Suppemental Table 5 [file 582940_file06.xlsx]

## Sheet: Sheet1
Supplemental Table 5. A list of the BDSC TRiP strains that were used to disrupt GPI-anchor biosynthesis.
BDSC Strain	FlyBase ID	Gene Symbol	Phenotype
51882	FBgn0034270	PIG-A	WT
62696	FBgn0034270	PIG-A	dark/black spot
67330	FBgn0037535	PIG-H	rough
65375	FBgn0035435	PIG-C	WT
38321	FBgn0034649	PIG-M	rough
51890	FBgn0034649	PIG-M	WT
51875	FBgn0033479	PIG-N	WT
38359	FBgn0035464	PIG-B	WT
67247	FBgn0034346	PIG-O	rough
44454	FBgn0030035	PIG-T	rough
38321	FBgn0034649	PIG-M	rough
